# Supplementary material
Source: PubMed Central journal article supplement (PMC7178251)
Supplement: ac9b05043_si_001.pdf [file ac9b05043_si_001.pdf]

## Supporting Information

### Hydrogel-based colorimetric assay for multiplexed microRNA detection in a microfluidic device

Hyewon Lee<sup>a</sup>, Jiseok Lee<sup>b</sup>, Seung-Goo Lee<sup>a,c,\*</sup>, and Patrick S. Doyle<sup>d,\*</sup>

<sup>a</sup>Synthetic Biology and Bioengineering Research Center, Korea Research Institute of Bioscience and Biotechnology, Daejeon 34141, Republic of Korea

<sup>b</sup>School of Energy and Chemical Engineering, Ulsan National Institute of Science and Technology, Ulsan 44919, Republic of Korea

<sup>c</sup>Department of Biosystems and Bioengineering, KRIBB School of Biotechnology, University of Science and Technology, Daejeon 34113, Republic of Korea

<sup>d</sup>Department of Chemical Engineering, Massachusetts Institute of Technology, 77 Massachusetts Avenue, Cambridge, MA 02139, United States

\*Corresponding author: P.S. Doyle and S.-G. Lee

E-mail: [pdoyle@mit.edu](mailto:pdoyle@mit.edu) and [sglee@kribb.re.kr](mailto:sglee@kribb.re.kr)

**Table S1.** Probe and target nucleic acid sequences

|                     |                                                                  |
|---------------------|------------------------------------------------------------------|
| let-7a probe        | 5'-Acryd/GAT ATA TTT TAA ACT ATA CAA CCT ACT ACC TCA/InvdT-3'    |
| miR-145 probe       | 5'-Acryd/ GAT ATA TTT TAA GGG ATT CCT GGG AAA ACT GGA C/InvdT-3' |
| miR-21 probe        | 5'-Acryd/GAT ATA TTT TAT CAA CAT CAG TCT GAT AAG CTA/InvdT-3'    |
| let-7a target       | 5'-UGA GGU AGU AGG UUG UAU AGU U-3'                              |
| mir-145 target      | 5'-GUC CAG UUU UCC CAG GAA UCC CU-3'                             |
| miR-21 target       | 5'-UAG CUU AUC AGA CUG AUG UUG A-3'                              |
| biotinylated linker | 5'-Phos/TAA AAT ATA TAA AAA AAA AAA A/Bio-3'                     |

**Table S2.** Detection limit

|         |        |
|---------|--------|
| let-7a  | 260 fM |
| miR-145 | 340 fM |
| miR-21  | 242 fM |

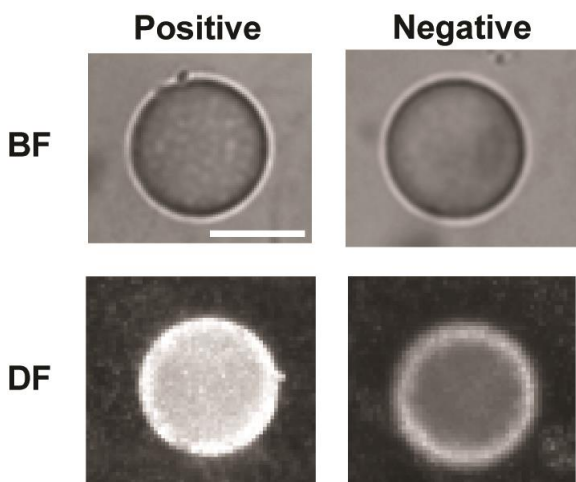

**Figure S1.** Comparison of bright-field (BF) and dark-field (DF) images. The DF image with the 5 nM of biotinylated probes (positive control) was clearly visualized compared to that with no biotinylated probes (negative control) while BF shows negligible differences. Scale bar represents 100  $\mu\text{m}$ .

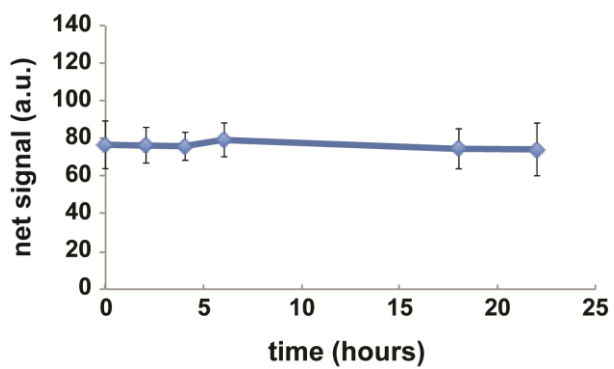

**Figure S2.** The stability of on-chip hydrogel-based colorimetric assay scheme. There was negligible net signal change over time. The error bars represent the standard deviation (n=6-15).

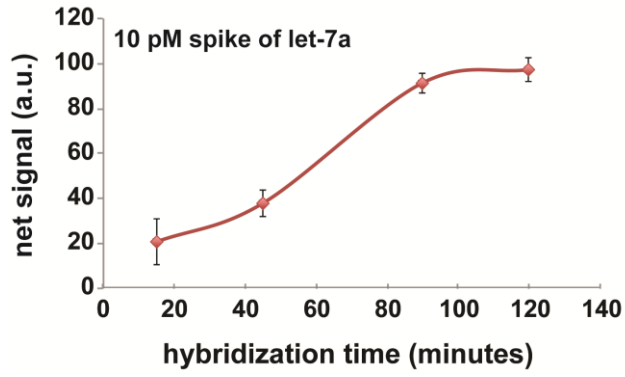

**Figure S3.** Target hybridization optimization. The net signal increased for up to 90 min of hybridization time. The error bars represent the standard deviation (n=11-15).

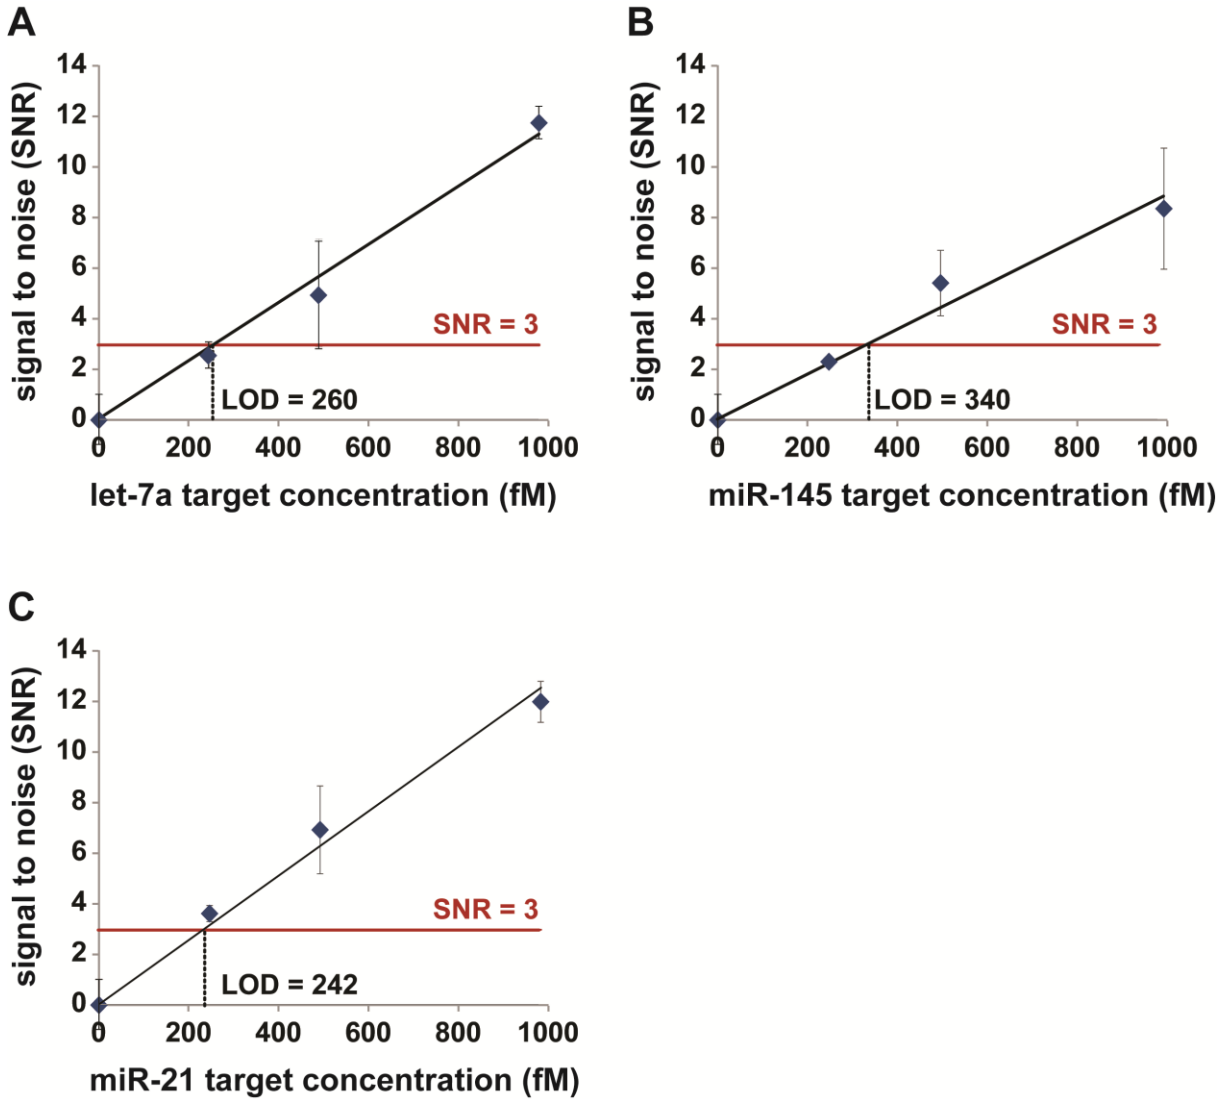

**Figure S4.** Determination of the limit of detection (LOD) of (A) let-7a, (B) miR-145, and (C) miR-21. The signal to noise ratio (SNR) was plotted as a function of the amount of target miRNAs. The LOD was defined as the target amount where the SNR was three (red line). To calculate the LOD, a line was fit to the data and extrapolated with a mean Pearson coefficient of  $\sim 0.99$ . The LOD was  $\sim 260$  fM let-7a, 340 fM miR-145, and 242 fM miR-21. The error bars represent the standard deviation of targets normalized by assay noise ( $n=5-10$ ).

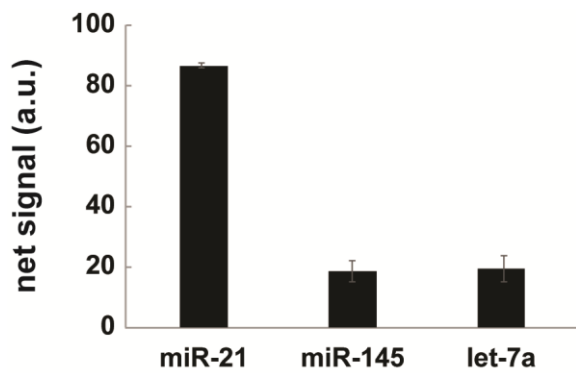

**Figure S5.** Detection specificity measurement using 10 pM miR-21 target. The minimal interference was observed with miR-145 and let-7a (~ 20% cross reactivity).

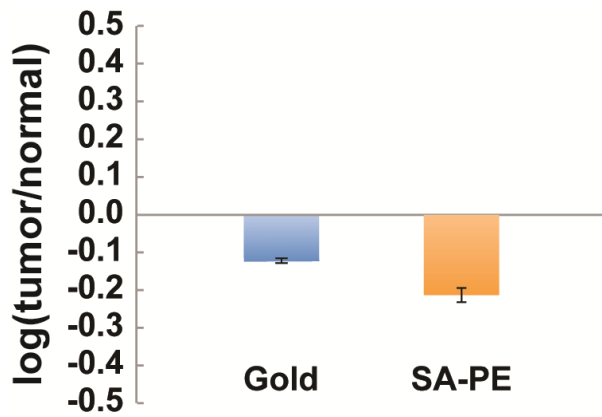

**Figure S6.** Assay validation of the miRNA assay using total RNA sample. The colorimetric assay based on gold ion deposition was compared to the previously developed assay scheme with a fluorescence label. On comparing the let-7 levels in the healthy versus lung tumor sample, both assays represent a similar dysregulation pattern. The error bars represent the standard deviation of miRNA expression measurements in tumor normalized by background-subtracted average miRNA signal in normal and by the ratio of tumor to normal miRNA expression.
